# Supplementary material for: Tailoring of network dimensionality and porosity adjustment in Zr- and Hf-based MOFs
Source: Royal Society of Chemistry journal article supplement (doi:10.1039/c3ce41121d), 2013-01-01
Supplement: c3ce41121d.pdf [file c3ce41121d.pdf]

Electronic supplementary information

## Tailoring network dimensionality and porosity adjustment in Zr- and Hf-based MOFs

Volodymyr Bon,<sup>a</sup> Irena Senkowska,<sup>\*a</sup> Manfred Weiss<sup>b</sup> and Stefan Kaskel<sup>a</sup>

<sup>a</sup> Department of Inorganic Chemistry, Dresden University of Technology, Bergstrasse 66, 01069 Dresden, Germany. Fax: +49 (351) 463 37287; E-mail: [irena.senkowska@chemie.tu-dresden.de](mailto:irena.senkowska@chemie.tu-dresden.de)

<sup>b</sup> Macromolecular Crystallography Group, Institute Soft Matter and Functional Materials, Albert-Einstein-Str. 15, 12489 Berlin, Germany. Fax: +49 (30) 8062 14975; E-mail: [manfred.weiss@helmholtz-berlin.de](mailto:manfred.weiss@helmholtz-berlin.de)

### 1. Powder X-ray diffraction patterns

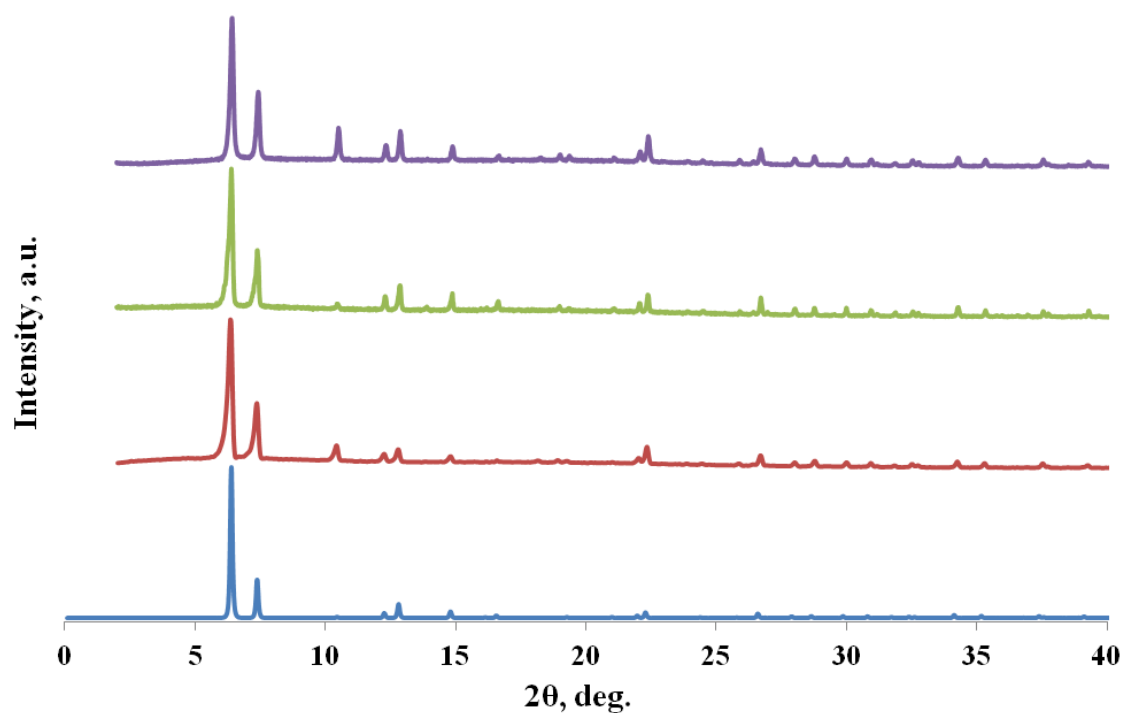

**Fig. S1.** Powder X-ray diffraction patterns for DUT-52(Zr): calculated from crystal structure (blue), “as made” (red), activated (light green), resolvated (violet).

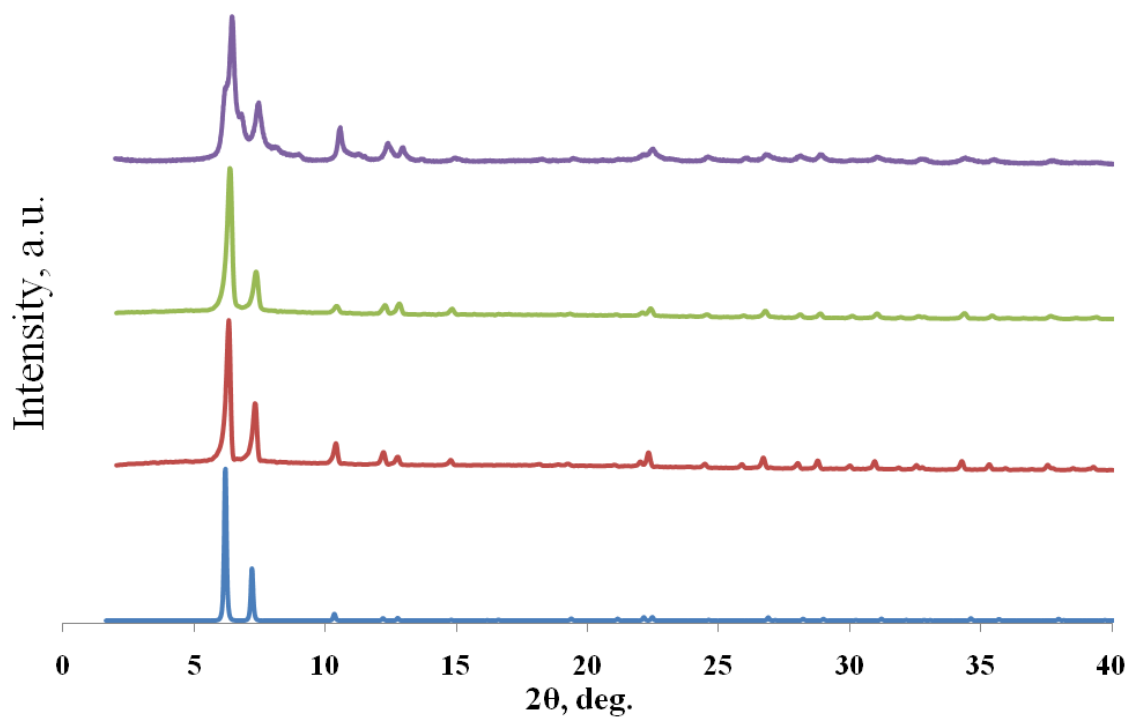

**Fig. S2.** Powder X-ray diffraction patterns for DUT-52(Hf): calculated from crystal structure (blue), “as made” (red), activated (light green), resolvated (violet).

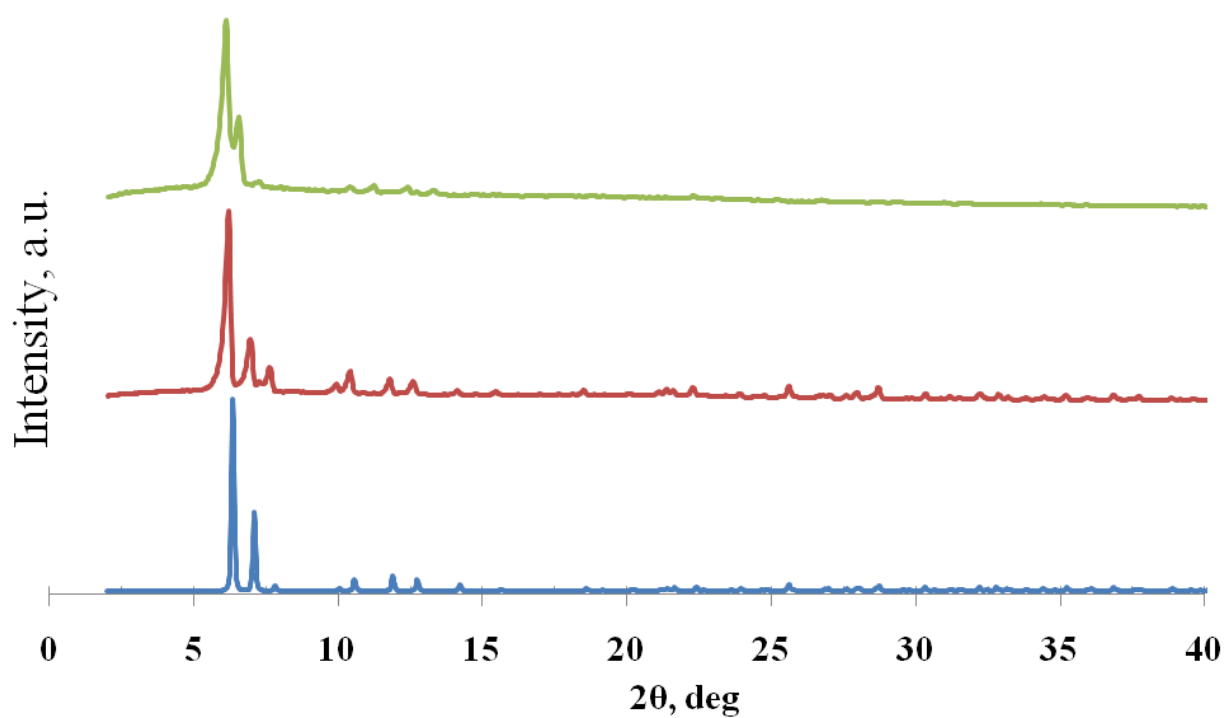

**Fig. S3.** Powder X-ray diffraction patterns for DUT-53(Hf): calculated from crystal structure (blue), “as made” (red), activated (light green).

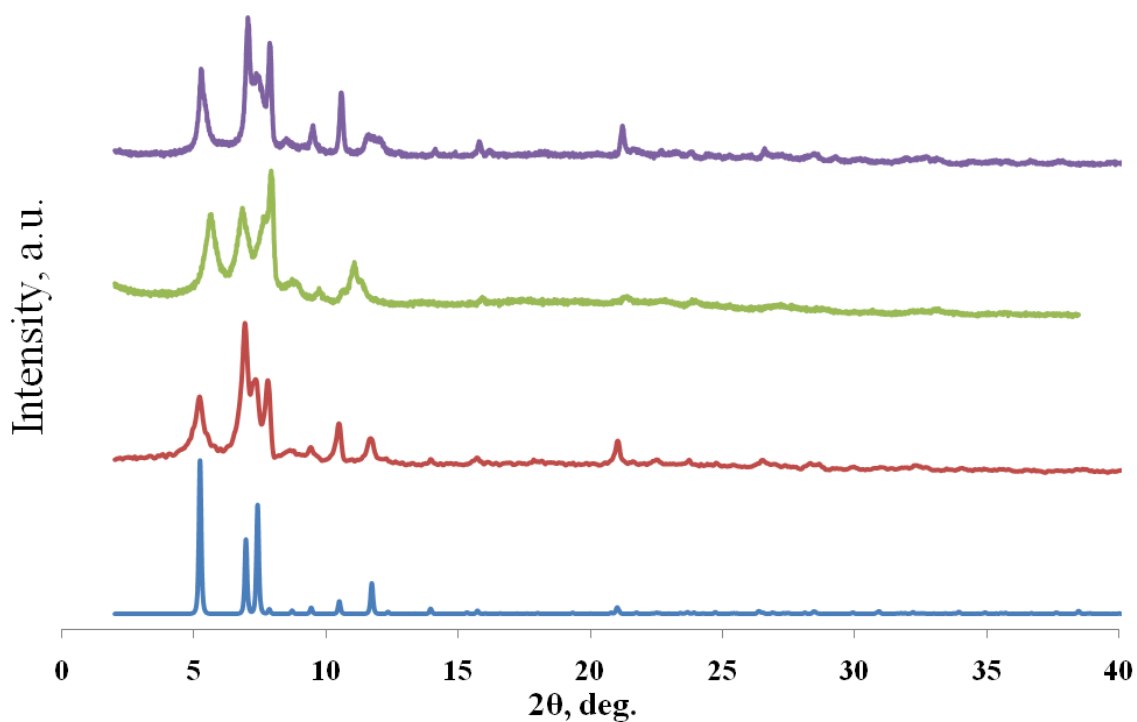

**Fig. S4.** Powder X-ray diffraction patterns for DUT-84(Zr): calculated from crystal structure (blue), “as made” (red), activated (light green), resolvated (violet).

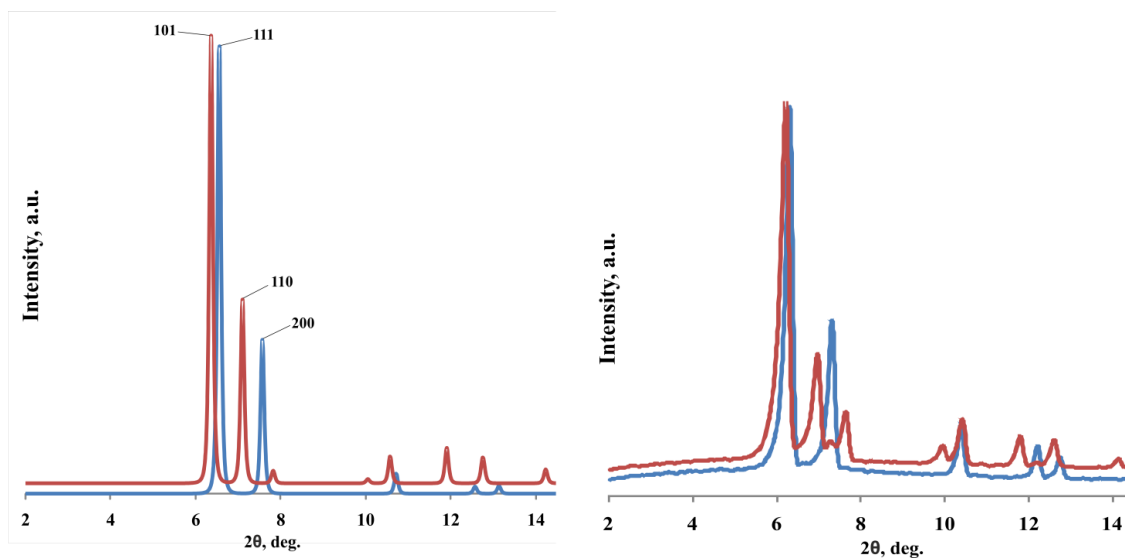

**Fig. S5.** Comparison of calculated (left) and experimental (right) powder XRDs of DUT-52(Zr) (blue) and DUT-53(Hf) – tetragonal phase (red) ( $\lambda = 1.5406 \text{ \AA}$ ).

## 2. Powley refinement for DUT-52(Hf)

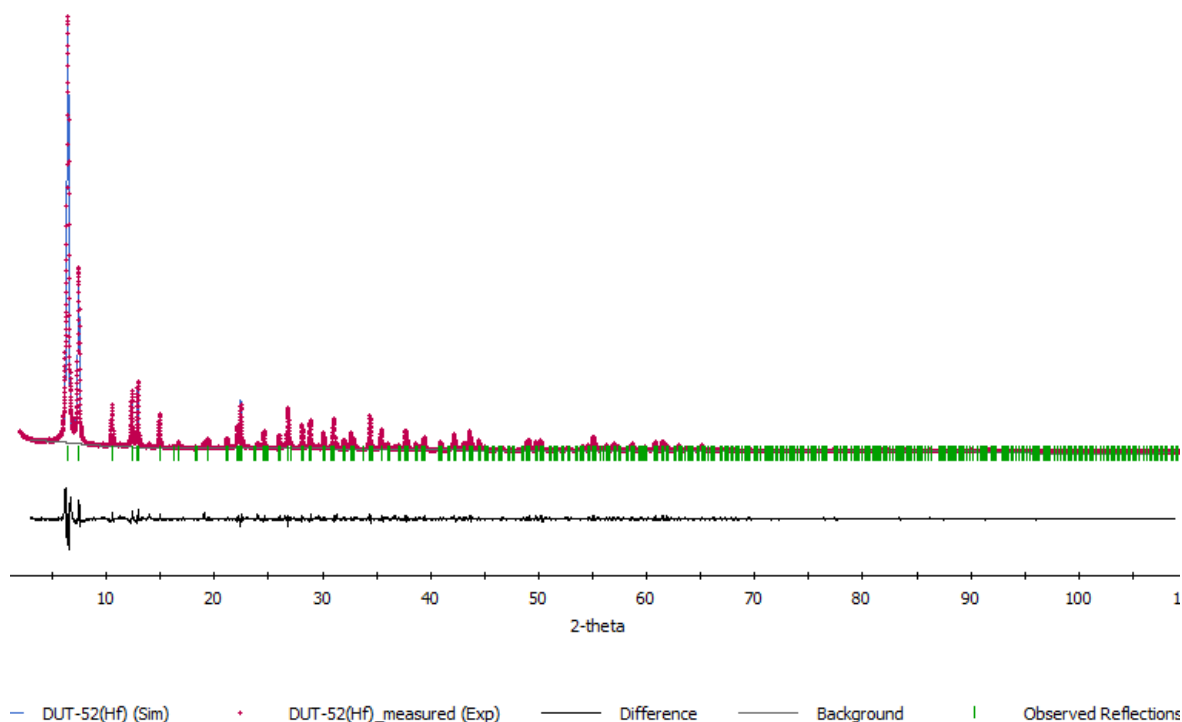

**Fig. S6.** Powley refinement plot of DUT-52(Hf).

### *Pawley refinement data for DUT-52(Hf)*

|                                     |                        |
|-------------------------------------|------------------------|
| Temperature                         | 293 K                  |
| Wavelength                          | 1.5406 Å               |
| Measurement system                  | STOE STADI P           |
| Geometry                            | Bragg-Brentano         |
| Crystal system                      | Cubic                  |
| Space group                         | <i>Fm-3m</i>           |
| Unit cell dimensions                | $a = 23.74391(24)$     |
| Cell Volume                         | $V = 13395.6(2)$       |
| $2\theta$ range                     | 3 – 110°               |
| Final $R$ indices                   |                        |
| $R_p$ $R_{wp}$                      | 0.0907 0.1215          |
| Final profile parameter for profile |                        |
| Profile function:                   | Thompson-Cox-Hastings  |
| $U$ :                               | $0.71230 \pm 0.01305$  |
| $V$ :                               | $-0.28413 \pm 0.00453$ |
| $W$ :                               | $0.02834 \pm 0.00053$  |
| $X$ :                               | $-0.29674 \pm 0.00744$ |
| $Y$ :                               | $0.14886 \pm 0.00128$  |
| Zero shift:                         | -0.01518               |

### 3. Thermogravimetric analysis of DUT-52, DUT-53 and DUT-84.

TG analysis was performed on the materials treated with ethanol and activated by heating at 100 °C in vacuum.

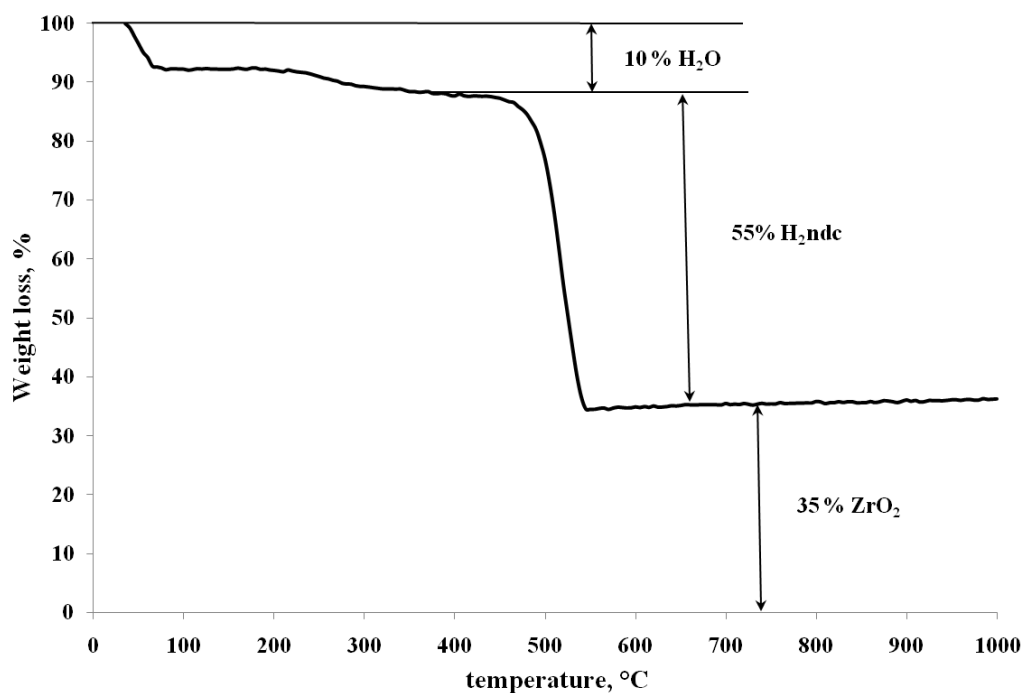

Fig S7. TG curve of DUT-52(Zr) "activated".

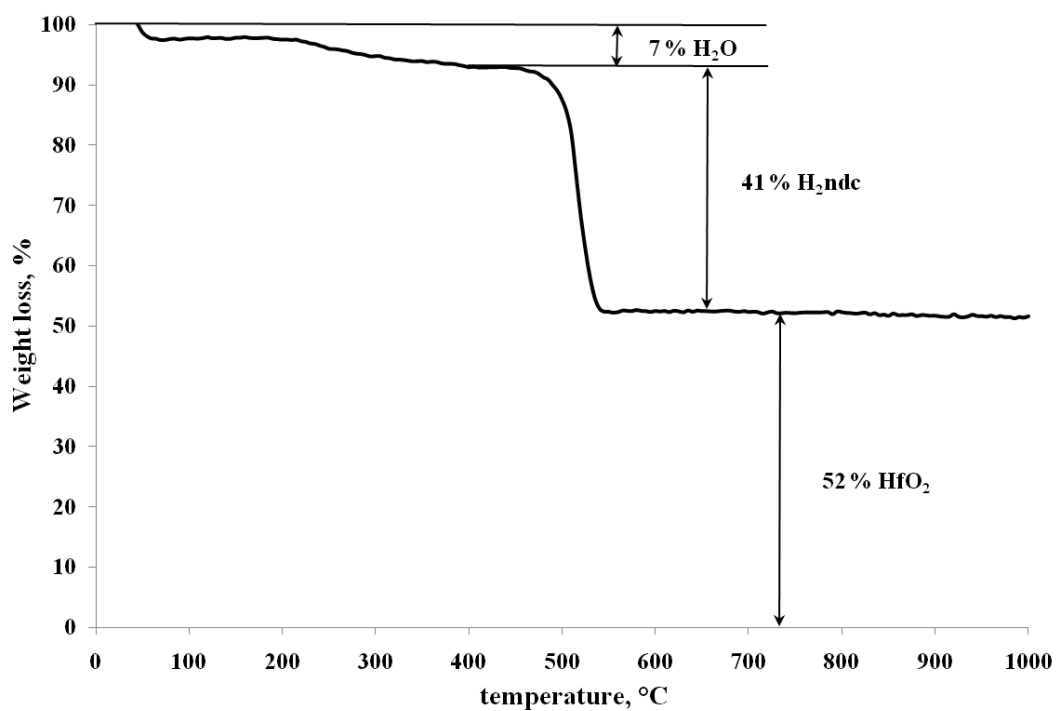

Fig S8. TG curve of DUT-52(Hf) "activated".

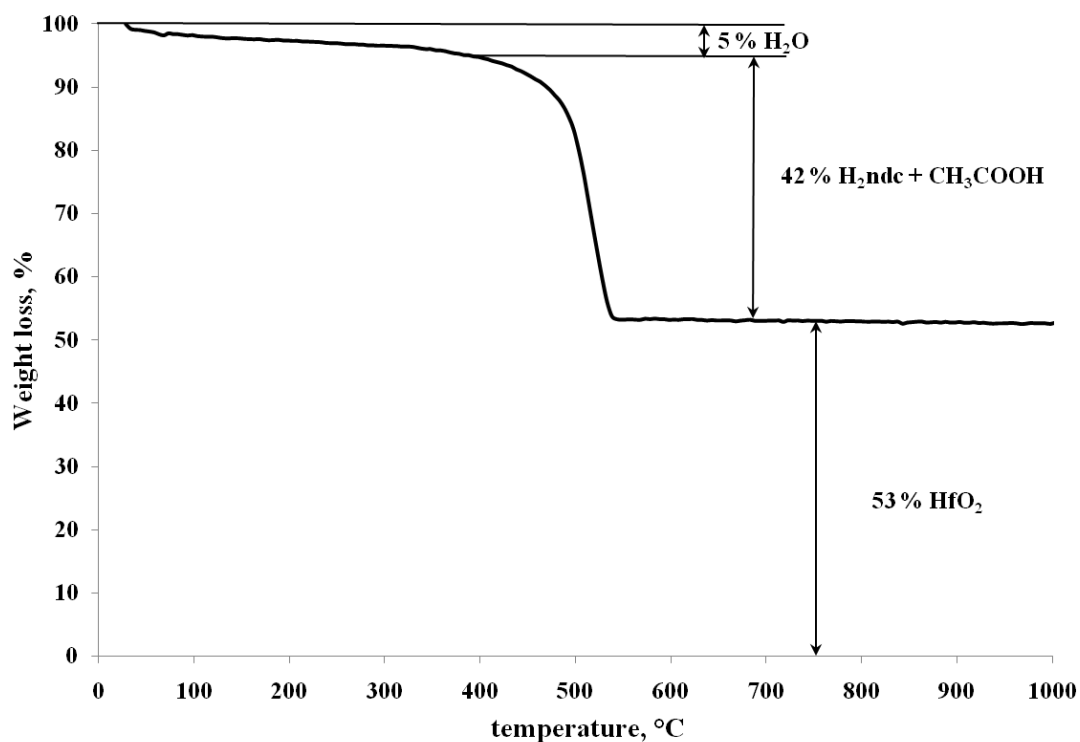

**Fig. S9** TG curve of DUT-53(Hf) "activated".

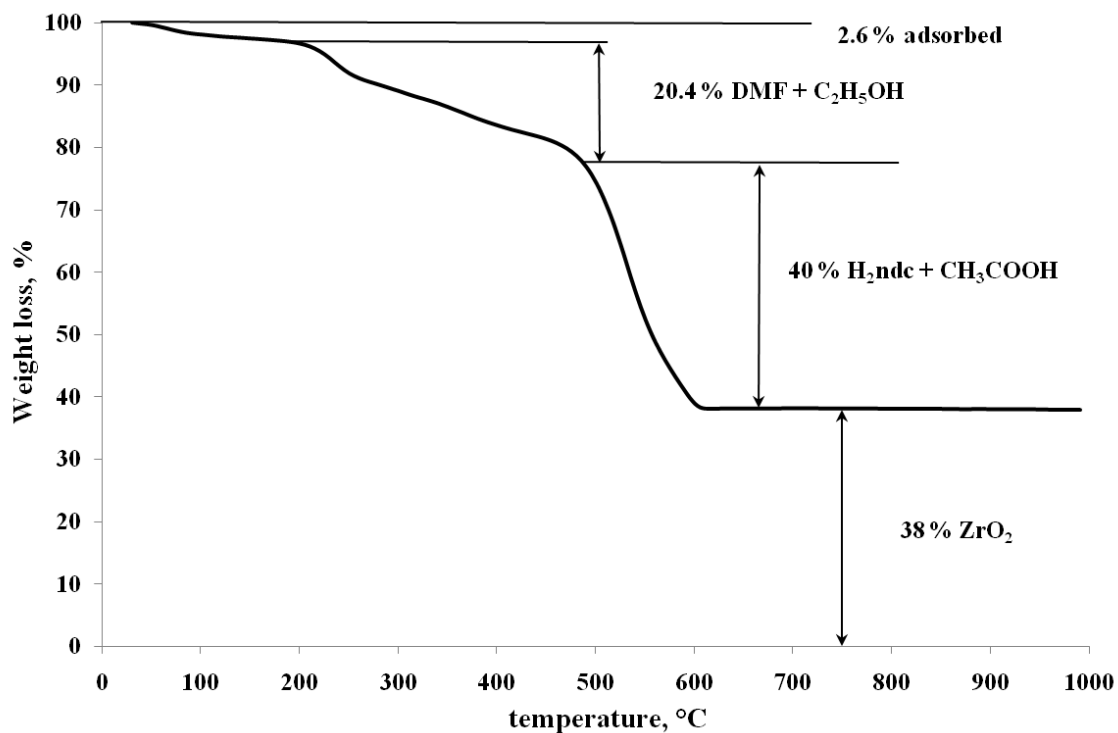

**Fig. S10** TG curve of DUT-84(Zr) "activated".

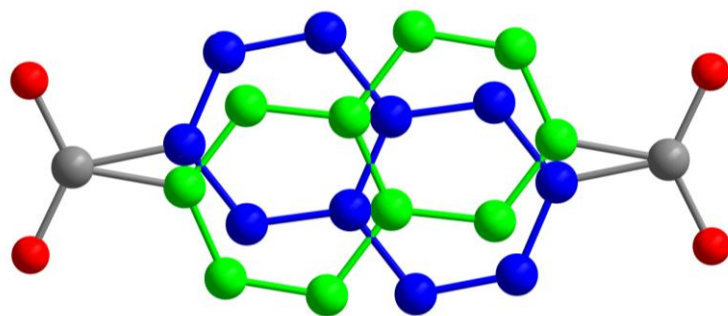

**Fig. S11** Disordered 2,6-ndc molecule in the DUT-52(Zr).
